# Supplementary material for: The effects of nano-curcumin supplementation on adipokines levels in obese and overweight patients with migraine: a double blind clinical trial study
Source: PubMed Central journal article supplement (PMC9125853; doi:10.1186/s13104-022-06074-4), 2022-05-23
Supplement: 13104_2022_6074_MOESM1_ESM.pdf [file 13104_2022_6074_MOESM1_ESM.pdf]

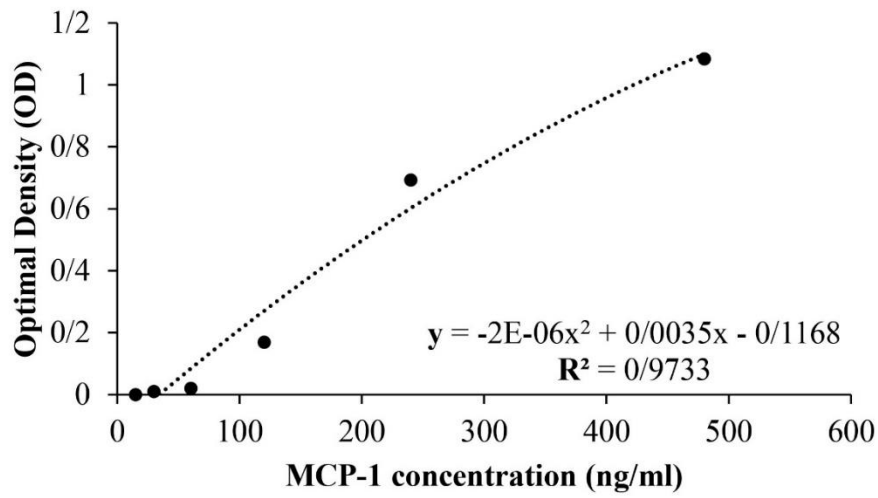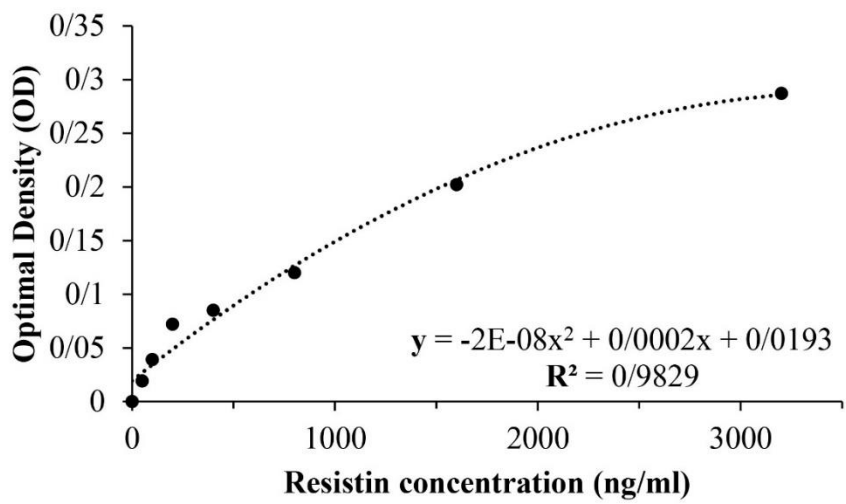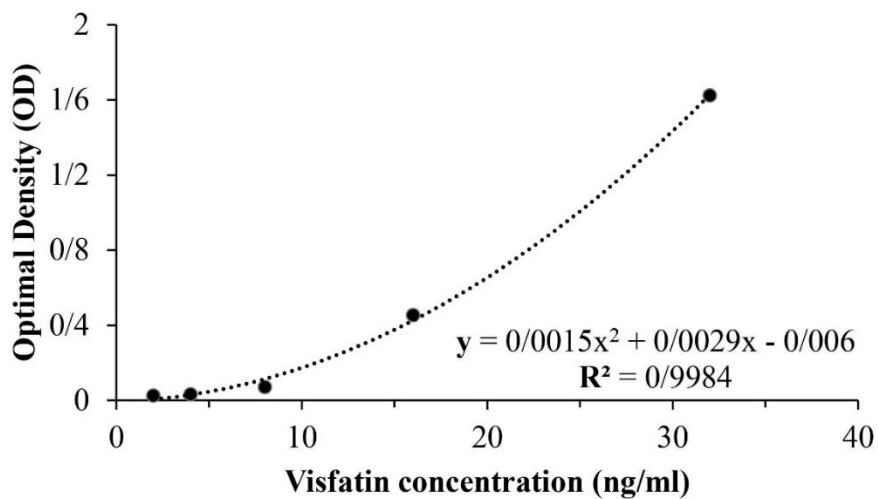

**Figure 1. ELISA standard curve of MCP-1, Resistin and Visfatine**
