# Supplementary material for: The effects of nano-curcumin supplementation on adipokines levels in obese and overweight patients with migraine: a double blind clinical trial study
Source: PubMed Central journal article supplement (PMC9125853; doi:10.1186/s13104-022-06074-4), 2022-05-23
Supplement: 13104_2022_6074_MOESM2_ESM.pdf [file 13104_2022_6074_MOESM2_ESM.pdf]

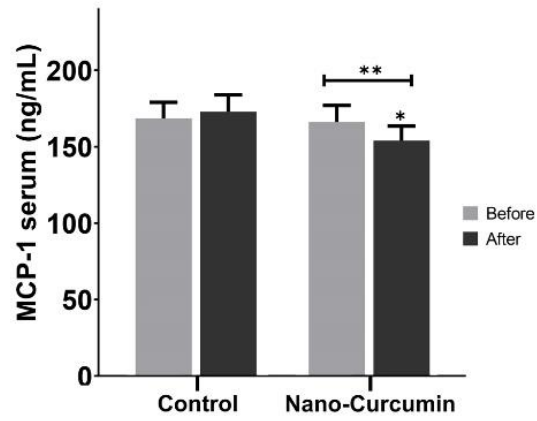

**Figure 2. MCP-1 serum levels in nano-curcumin and control groups.** A significant reduction has been observed in MCP-1 levels in nano-curcumin group. This difference also is significant between groups. \* P value <0.05. Each value represents mean  $\pm$  SEM.
